# Supplementary material
Source: PubMed Central journal article supplement (PMC5805024)
Supplement: NIHMS75921-supplement-Supplementary_Tables.pdf [file NIHMS75921-supplement-Supplementary_Tables.pdf]

## **Supplementary Table 1: Categories of evidence and strength of recommendations**

---

### **Categories of evidence for causal relationships and treatment**

**Ia:** Evidence from meta-analysis of randomised controlled trials

**Ib:** Evidence from at least one randomised controlled trial

**IIa:** Evidence from at least one controlled study without randomisation

**IIb:** Evidence from at least one other type of quasi-experimental study

**III:** Evidence from non-experimental descriptive studies, such as comparative studies, correlation studies and case-control studies

**IV:** Evidence from expert committee reports or opinions and/or clinical experience of respected authorities

### **Categories of evidence for observational relationships**

**I:** Evidence from large, representative population samples

**II:** Evidence from small, well-designed, but not necessarily representative samples

**III:** Evidence from non-representative surveys, case reports

**IV:** Evidence from expert committee reports or opinions and/or clinical experience of respected authorities

### **Strength of recommendation**

**A** Directly based on category I evidence

**B** Directly based on category II evidence or extrapolated from category I evidence

**C** Directly based on category III evidence or extrapolated from category II evidence

**D** Directly based on category IV evidence or extrapolated from category III evidence

**S** Standard of good clinical care

### **Supplementary table 2: DSM-5 diagnostic criteria for ASD**

**A) Persistent deficits in social communication and social interaction across multiple contexts, as manifested by the following, currently or by history (examples are illustrative, not exhaustive):**

**1** Deficits in social-emotional reciprocity, ranging, for example, from abnormal social approach and failure of normal back-and-forth conversation; to reduced sharing of interests, emotions, or affect; to failure to initiate or respond to social interactions.

**2** Deficits in non-verbal communicative behaviours used for social interaction, ranging, for example, from poorly integrated verbal and non-verbal communication;

to abnormalities in eye contact and body language or deficits in understanding and use of gestures; to a total lack of facial expressions and non-verbal communication.

**3** Deficits in developing, maintaining, and understanding relationships, ranging, for example, from difficulties adjusting behaviour to suit various social contexts; to difficulties in sharing imaginative play or in making friends; to absence of interest in peers.

**B) Restricted, repetitive patterns of behaviour, interests, or activities, as manifested by at least two of the following, currently or by history (examples are illustrative, not exhaustive):**

**1** Stereotyped or repetitive motor movements, use of objects, or speech (eg, simple motor stereotypies, lining up toys or flipping objects, echolalia, idiosyncratic phrases).

**2** Insistence on sameness, inflexible adherence to routines, or ritualised patterns of verbal or non-verbal behavior (eg, extreme distress at small changes, difficulties with transitions, rigid thinking patterns, greeting rituals, need to take same route or eat same food every day).

**3** Highly restricted, fixated interests that are abnormal in intensity or focus (eg, strong attachment to or preoccupation with unusual objects, excessively circumscribed or perseverative interests).

**4** Hyper- or hyporeactivity to sensory input or unusual interest in sensory aspects of the environment (eg, apparent indifference to pain/temperature, adverse response to specific sounds or textures, excessive smelling or touching of objects, visual fascination with lights or movement).

**C) Symptoms must be present in the early developmental period (but may not become fully manifest until social demands exceed limited capacities, or may be masked by learned strategies in later life).**

**D) Symptoms cause clinically significant impairment in social, occupational, or other important areas of current functioning.**

**E) These disturbances are not better explained by intellectual disability (intellectual developmental disorder) or global developmental delay. Intellectual disability and autism spectrum disorder frequently co-occur; to make comorbid diagnoses of autism spectrum disorder and intellectual disability, social communication should be below that expected for general developmental level.**

Note: Individuals with a well-established DSM-IV diagnosis of autistic disorder, Asperger's disorder, or pervasive developmental disorder not otherwise specified should be given the diagnosis of autism spectrum disorder.

Individuals who have marked deficits in social communication, but whose symptoms do not otherwise meet criteria for autism spectrum disorder, should be evaluated for social (pragmatic) communication disorder.

Specify if:

- With or without accompanying intellectual impairment
- With or without accompanying language impairment
- Associated with a known medical or genetic condition or environmental factor
- Associated with another neurodevelopmental, mental, or behavioural disorder
- With catatonia (refer to the criteria for catatonia associated with another mental disorder)

*(Reproduced from the Diagnostic and Statistical Manual of Mental Disorders, fifth edition (DSM-5))*

**Supplementary table 3- Severity specifiers for the characterization of variation in adaptive functioning in autism spectrum**

|                                                       | <b>Social communication</b>                                                                                                                                                                                                                                                                                                                                                                                                                | <b>Restricted, repetitive behaviours</b>                                                                                                                                                                                                                                        |
|-------------------------------------------------------|--------------------------------------------------------------------------------------------------------------------------------------------------------------------------------------------------------------------------------------------------------------------------------------------------------------------------------------------------------------------------------------------------------------------------------------------|---------------------------------------------------------------------------------------------------------------------------------------------------------------------------------------------------------------------------------------------------------------------------------|
| <b>Level 3<br/>Requiring very substantial support</b> | Severe deficits in verbal and non-verbal social communication skills cause severe impairments in functioning, very limited initiation of social interactions, and minimal response to social overtures from others. For example, a person with few words of intelligible speech who rarely initiates interaction and, when he or she does, makes unusual approaches to meet needs only and responds to only very direct social approaches. | Inflexibility of behaviour, extreme difficulty coping with change, or other restricted/repetitive behaviours markedly interfere with functioning in all spheres. Great distress/ difficulty changing focus or action.                                                           |
| <b>Level 2<br/>Requiring substantial support</b>      | Marked deficits in verbal and non-verbal social communication skills; social impairments apparent even with supports in place; limited initiation of social interactions; and reduced or abnormal responses to social overtures from others. For example, a person who speaks simple sentences, whose interaction is limited to narrow special interests, and who has markedly odd non-verbal communication.                               | Inflexibility of behaviour, difficulty coping with change or other restricted/repetitive behaviours appear frequently enough to be obvious to the casual observer and interfere with functioning in a variety of contexts. Distress and/or difficulty changing focus or action. |
| <b>Level 1<br/>Requiring support</b>                  | Without supports in place, deficits in social communication cause noticeable impairments. Difficulty initiating social                                                                                                                                                                                                                                                                                                                     | Inflexibility of behaviour causes significant interference with functioning in one or more contexts. Difficulty switching between                                                                                                                                               |

|  |                                                                                                                                                                                                                                                                                                                                                                                            |                                                                        |
|--|--------------------------------------------------------------------------------------------------------------------------------------------------------------------------------------------------------------------------------------------------------------------------------------------------------------------------------------------------------------------------------------------|------------------------------------------------------------------------|
|  | interactions, and clear examples of atypical or unsuccessful response to social overtures from others. May appear to have decreased interest in social interactions. For example, a person who is able to speak in full sentences and engages in communication but whose to-and-fro conversation with others fails, and whose attempts to make friends are odd and typically unsuccessful. | activities. Problems of organisation and planning hamper independence. |
|--|--------------------------------------------------------------------------------------------------------------------------------------------------------------------------------------------------------------------------------------------------------------------------------------------------------------------------------------------------------------------------------------------|------------------------------------------------------------------------|

*(Reproduced from the Diagnostic and Statistical Manual of Mental Disorders, fifth edition (DSM-5))*

**Supplementary table- 4 Screening tools for children and young people**

|                                                     | Validity                                                                                                                                                                    | Age          | Description                                                                                   |
|-----------------------------------------------------|-----------------------------------------------------------------------------------------------------------------------------------------------------------------------------|--------------|-----------------------------------------------------------------------------------------------|
| Modified- Checklist for Autism in Toddlers (M-CHAT) | <p><b>Sensitivity:</b><br/>64% (18-48 months)<br/>88% (30-48 months)</p> <p><b>Specificity</b><br/>75% (18-48 months)<br/>38% (30-48 months)<br/>(Charman et al., 2015)</p> | 16-30 months | 23 item questionnaire by caregiver                                                            |
| Early Screening for Autistic Traits (ESAT)          | Positive predictive value 25% for ASD (Dietz et al., 2006)                                                                                                                  | 14 months    | 14 item 2-stage questionnaire completed by health practitioner after interview with caregiver |
| Checklist for                                       |                                                                                                                                                                             | 18 months    | 14 item 2 stage                                                                               |

|                                                     |                                                                                                                                                                                                                                              |                           |                                                                                                                                       |
|-----------------------------------------------------|----------------------------------------------------------------------------------------------------------------------------------------------------------------------------------------------------------------------------------------------|---------------------------|---------------------------------------------------------------------------------------------------------------------------------------|
| Autism in Toddlers (CHAT)                           | Sensitivity 21%<br>Specificity 100%<br>Positive predictive value 59%<br><br>(Baird et al., 2000)                                                                                                                                             |                           | questionnaire: 5 completed by health practitioner<br>9 completed by caregiver                                                         |
| Social Communication Questionnaire (SCQ)            | a) Sensitivity 82%(18-48 months)<br>Specificity 50%(18-48 months)<br>(Charman et al., 2015)<br>b) Sensitivity 56%(4-12yr old)<br>69%(13-21years old)<br>c) Specificity 74%(4-12yr old)<br>71%(13-21years old)<br>(Barnard-Brak et al., 2015) | > 4 years                 | 40 item questionnaire completed by caregiver                                                                                          |
| Childhood Autism Spectrum Test (CAST)               | Sensitivity 100%<br>Specificity 97%<br>(Williams et al., 2005)                                                                                                                                                                               | 4-11 years<br>10-16 years | 50 item questionnaire completed by caregiver                                                                                          |
| Parents Evaluations for Developmental Status (PEDS) | <b>Sensitivity</b><br>68%(21 months to 4.5 years)<br>87% (4.5 - 8 years)<br><b>Specificity</b><br>66%(21 months to 4.5 years)                                                                                                                | 21 months to 8 years      | 18 item questionnaire<br>10 open –ended questions about behavior, learning and development<br>8 questions with prompts to parents for |

|                                                |                                                                                                                                                                                                                                   |              |                                              |
|------------------------------------------------|-----------------------------------------------------------------------------------------------------------------------------------------------------------------------------------------------------------------------------------|--------------|----------------------------------------------|
|                                                | 79%(4.5-8 years)<br>(Glascoe, 2003)                                                                                                                                                                                               |              | each developmental domain                    |
| Screening Tool for Autism in Toddlers (STAT)   | <b>Sensitivity</b><br>92% (12-35 months)<br><b>Specificity</b><br>85% (12-35 months)<br>(Stone et al., 2004)                                                                                                                      | 24-36 months | 12 item questionnaire;<br>2 stages           |
| Social Responsiveness Scale (SRS)              | <b>Sensitivity</b> 75%<br><b>Specificity</b> 96%<br>(Constantino et al., 2007)                                                                                                                                                    | >2.5 years   | 65 item questionnaire completed by caregiver |
| Autism Spectrum Screening Questionnaire (ASSQ) | <b>Sensitivity</b><br>Non clinical setting<br>P: 91%, T: 90%<br>Clinical Setting<br>P: 62%, T: 70%<br><b>Specificity</b><br>Non clinical setting<br>P: 77%, T: 58%<br>Clinical Setting<br>P: 90%, T: 91%<br>(Ehlers et al., 1999) | 7-16 years   | 27 item questionnaire completed by caregiver |

**Supplementary table 5- Diagnostic Instruments for children and young people**

|                                               | Validity                                        | Age        | Description                          |
|-----------------------------------------------|-------------------------------------------------|------------|--------------------------------------|
| Autism Diagnostic Observation Schedule (ADOS) | Sensitivity<br>94-100%<br>Specificity<br>52-76% | >12 months | Clinical observation via interaction |

|                                                                 |                                                                                                           |                           |                                                                                                                 |
|-----------------------------------------------------------------|-----------------------------------------------------------------------------------------------------------|---------------------------|-----------------------------------------------------------------------------------------------------------------|
|                                                                 | (Zander et al., 2015)                                                                                     |                           |                                                                                                                 |
| Autism Diagnostic Interview Revised (ADI-R)                     | <b>Sensitivity</b> 44-52%<br><b>Specificity</b> 91-96%<br>(Zander et al., 2015)                           | >2 years                  | 93 item interview with caregiver                                                                                |
| Developmental, Dimensional, Diagnostic Interview (3Di)          | <b>Sensitivity</b> 100%<br><b>Specificity</b> 98%<br>(Skuse et al., 2004)                                 | >2 years                  | 266 item computer- based interview with caregiver                                                               |
| Diagnostic interview for Social Communication Disorders (DISCO) | Sensitivity 96%<br>Specificity 79%<br><br>(Maljaars et al., 2012)                                         | All ages                  | 362 item interview with caregiver                                                                               |
| Development and Well Being Assessment (DAWBA)                   | Sensitivity 92% in the clinic sample<br>Specificity 89% in the community sample<br>(Goodman et al., 2000) | 5-16 years<br>11-16 years | 4 components<br>i) Interview<br>ii) Parent interview<br>iii) Teacher questionnaire<br>iv) Computer based rating |
| Childhood Autism Rating Scale (CARS)                            | Sensitivity 94%<br>Specificity 85%<br>(Perry et al., 2005)                                                | >2years                   | 15 item completed by researcher, and a questionnaire completed by caregiver                                     |

*Supplementary table 6- Screening tools for Adults*

|                                                                 | Validity                                                                                                                                                                                                            | Age       | Description                                  |
|-----------------------------------------------------------------|---------------------------------------------------------------------------------------------------------------------------------------------------------------------------------------------------------------------|-----------|----------------------------------------------|
| <b>Autism Spectrum Quotient (AQ)</b>                            | Sensitivity 95%<br>Specificity 52%<br>(Woodbury-Smith et al., 2005)                                                                                                                                                 | >16 years | 50 item questionnaire; self-report           |
| <b>Social Responsiveness Scale (SRS-A)</b>                      | <b>Sensitivity</b><br>Men: 84%<br>Women: 95%<br><b>Specificity</b><br>Men: 81%<br>Women: 61%<br>(Takei et al., 2014)                                                                                                | >18 years | 65 item questionnaire completed by caregiver |
| <b>Ritvo Autism Asperger Diagnostic Scale-Revised (RAADS-R)</b> | <b>English sample:</b><br><b>Sensitivity:</b> 97%<br><b>Specificity:</b> 100%<br>(Ritvo et al., 2011)<br><br><b>Swedish sample</b><br><b>Sensitivity:</b> 91%<br><b>Specificity:</b> 93%<br>(Andersen et al., 2011) | > 18years | 80 item questionnaire; self-report           |

**Supplementary table 7. Summary of treatment studies for core symptoms of ASD**

| Study                              | Design        | Population | Age (years) | Sample size (total) | Drug and dose (final mean unless other stated) | Comparator | Duration (weeks) | Primary outcome | Secondary outcomes                                                |
|------------------------------------|---------------|------------|-------------|---------------------|------------------------------------------------|------------|------------------|-----------------|-------------------------------------------------------------------|
| <b>Serotonergic agents</b>         |               |            |             |                     |                                                |            |                  |                 |                                                                   |
| Barthelemy et al (1989)            | R, DB, PC     | ASD        | 3-10        | 13                  | Fenfluramine<br>1.5 mg/kg                      | Placebo    | 12               | None specified  | Behavior Summarized Evaluation Scale↔                             |
| King et al (2009)                  | R, DB, PC     | ASD        | 5-17        | 149                 | Citalopram<br>16.5 mg/day                      | Placebo    | 12               | CGI-I↔          | CYBOCS-PDD↔<br>RBS↔<br>ABC-I↑<br>ABC- other subscales↔            |
| Hollander et al (2005)             | R, DB, PC, XO | ASD        | 5-17        | 45                  | Fluoxetine<br>10 mg/day                        | Placebo    | 2 x8             | CY-BOCS↑        | CGI-AD↔                                                           |
| Neuropharm (2012) unpublished data | R, DB, PC     | ASD        | 5-17        | 158                 | Fluoxetine<br>2-18 mg/day                      | Placebo    | 14               | CYBOCS↔         |                                                                   |
| McDougle et al (1996)              | R, DB, PC     | ASD        | 18-53       | 30                  | Fluvoxamine<br>Max of 300 mg/day               | Placebo    | 12               | CYBOCS↑         | VABS↑<br>CGI-I↑<br>Brown Aggression Scale↑<br>RFRLS ↑             |
| Buchsbaum et al (2001)             | R, DB, PC, XO | ASD        | 30.5 (8.6)  | 6                   | Fluoxetine<br>20-40 mg/day                     | Placebo    | 16               | None specified  | CYBOCS↑<br>CGI-I ↔<br>Hamilton Anxiety ↑<br>Hamilton Depression ↔ |

|                             |                                  |     |                                    |                               |                                                                                                                                                     |         |                |                                                                        |                                                          |
|-----------------------------|----------------------------------|-----|------------------------------------|-------------------------------|-----------------------------------------------------------------------------------------------------------------------------------------------------|---------|----------------|------------------------------------------------------------------------|----------------------------------------------------------|
| Hollander et al (2012)      | R, DB, PC                        | ASD | 18-60                              | 37                            | Fluoxetine<br>64.76mg/day                                                                                                                           | Placebo | 12             | Y-BOCS↑<br>CGI-I for obsessive compulsive scale↔                       | CGI-I↑<br>HAM-D↔<br>ABC-I↔                               |
| <b>Glutamatergic agents</b> |                                  |     |                                    |                               |                                                                                                                                                     |         |                |                                                                        |                                                          |
| Jacquemont et al (2011)     | R, DB, PC                        | FXS | 18-35                              | 30                            | AFQ056<br>Dose was titrated up from day 1 to day 20 up to 150 mg twice a day and then down to 50 mg twice a day for the last four days of the trial | Placebo | 4              | ABC-C↔                                                                 | ABC- L/SW↑<br>CGI ↔<br>VABS↑<br>RSR-R↑<br>VAS↑<br>SRS↑   |
| Berry-Kravis et al (2016)   | R, DB, PC                        | FXS | Adults: 18-45<br>Adolescents 12-17 | 175 adults<br>139 adolescents | AFQ056<br>25 mg -100mg twice a day                                                                                                                  | Placebo | 12             | ABC-C <sub>fx</sub> ↔in FXS with complete mutation or partial mutation | CGI-I ↔<br>RSR-R↔<br>SRS↔<br>CNS-VS↔<br>TEA-CH↔          |
| Erickson et al (2007)       | OpL                              | PDD | 6-19                               | 18                            | Memantine<br>10.1 mg/day                                                                                                                            | None    | 19.3           | None specified                                                         | CGI- S↑<br>CGI- I↑<br>ABC-H/NC↑<br>ABC-other subscales ↔ |
| Aman et al (2017)           | a) R, DB, PC<br>b) OpL extension | ASD | 6-12                               | a) 121<br>b) 104              | Memantine<br>3-15 mg/day                                                                                                                            | Placebo | a) 12<br>b) 48 | SRS↔                                                                   | CATS-I↔<br>CCC-2↔                                        |

|                           |           |     |          |    |                                                                                                       |         |    |                                                             |                                                                                                                                                                                                                                                                                                |
|---------------------------|-----------|-----|----------|----|-------------------------------------------------------------------------------------------------------|---------|----|-------------------------------------------------------------|------------------------------------------------------------------------------------------------------------------------------------------------------------------------------------------------------------------------------------------------------------------------------------------------|
| Posey et al (2004)        | SB        | PDD | 5.1–27.6 | 12 | d-cycloserine in three ascending doses (0.7, 1.4, and 2.8 mg/kg/day) doses were changed every 2 weeks | Placebo | 8  | None specified                                              | CGI-S ↑<br>SRS↔<br>ABC- L/SW↑<br>ABC- other subscales↔<br>CY-BOCS↔                                                                                                                                                                                                                             |
| Minshawai et al (2016)    | R, DB, PC | ASD | 5-11     | 60 | d-cycloserine 50 mg/day                                                                               | Placebo | 10 | SRS↔                                                        | VABSII↔<br>ABC↔<br>CGI ↔<br>TSSA↔                                                                                                                                                                                                                                                              |
| Berry-Kravis et al (2006) | R, DB, PC | FXS | 6-21     | 49 | CX516 300mg/day                                                                                       | Placebo | 4  | Memory Sub- tests of the Test of Visual— Perceptual Skills↔ | W-JR- Memory for words subtest ↔<br>RBANS↔<br><br>SNAP IV, and the Integrated Visual & Auditory Continuous Performance Test↔<br><br>Peabody Picture Vocabulary Test-III (Forms A and B) and the Preschool Language Scale-4 ↔<br><br>Clinical Evaluation of Language Fundamentals-3 ↔<br>ABC-I↑ |

|                                   |               |                       |            |     |                                                               |         |    |           |                                                                                                                     |
|-----------------------------------|---------------|-----------------------|------------|-----|---------------------------------------------------------------|---------|----|-----------|---------------------------------------------------------------------------------------------------------------------|
|                                   |               |                       |            |     |                                                               |         |    |           | ABC- other subscales ↔<br>CGI-I↔                                                                                    |
| <b>GABAergic agents</b>           |               |                       |            |     |                                                               |         |    |           |                                                                                                                     |
| Berry-Kravis et al (2012)         | R, DB, PC, XO | FXS                   | 6-39       | 63  | Arbaclofen<br>20-30mg/day                                     | Placebo | 4  | ABC-I↔    | ABC-SA↑ in subgroup with<br>severe social imp.<br><br>ABC-L/SW↔<br>CGI↔<br>VAS↑                                     |
| Erickson et al (2014)             | OpL           | ASD<br>PDD<br>PDD-NOS | 6-17       | 32  | Arbaclofen<br>2-30mg/day                                      | N/A     | 8  | ABC-I↑    | ABC-L/SW↑<br>CGI-I↑<br>CGI-S↑<br>SRS↑<br>CY-BOCS-PDD↑<br>CASI↑<br>ADHD-A scale↑<br>VABS- Communication<br>subscale↑ |
| Veenstra-VanderWeele et al (2016) | R, DB, PC, XO | ASD                   | 5-21       | 150 | Arbaclofen<br>Children =<br>26.8mg/day<br>adults = 41.1mg/day | Placebo | 12 | ABC-L/SW↔ | CGI -S↑<br>CGI-I↔<br>VAS ↔<br>VABS↔<br>ADHD-IV↔                                                                     |
| Fung et al (2014)                 | OpL           | ASD                   | 22.5 (5.8) | 12  | Pregnenolone<br>50-250mg/day                                  | N/A     | 12 | ABC-I↑    | ABC- L/SW↑<br>ABC-other subscales↔<br>SSP↔<br>SRS ↔                                                                 |

|                                   |                                                                    |            |                   |     |                            |         |        |                                                                           |                            |
|-----------------------------------|--------------------------------------------------------------------|------------|-------------------|-----|----------------------------|---------|--------|---------------------------------------------------------------------------|----------------------------|
|                                   |                                                                    |            |                   |     |                            |         |        |                                                                           | VABS↔                      |
| <b>Dopamine receptor blockers</b> |                                                                    |            |                   |     |                            |         |        |                                                                           |                            |
| McDougle et al (2005)             | Secondary analysis of McCracken (2002) and RUPPAN (2005)           | ASD        | 8.8 (2.7)         | 101 | Risperidone 2.0mg/day      | Placebo | 8 & 16 | Primary outcomes are reported in McCracken et al (2002) and RUPPAN (2005) | RFRLS↑<br>Y-BOCS↑<br>VABS↑ |
| Scahill et al (2013)              | Secondary analysis of McCracken et al (2002) and Aman et al (2009) | ASD<br>PDD | 1)5-17<br>2) 4-13 | 225 | Risperidone 0.5-3.5 mg/day | Placebo | 8      | None specified                                                            | ↑ABC-L/SW                  |

|                      |                                                                                                           |             |      |     |                                                                        |         |   |                                                                      |                                          |
|----------------------|-----------------------------------------------------------------------------------------------------------|-------------|------|-----|------------------------------------------------------------------------|---------|---|----------------------------------------------------------------------|------------------------------------------|
| Marcus et al (2009)  | R, DB, PC                                                                                                 | ASD         | 6-17 | 218 | Aripiprazole<br>Randomised dose<br>5, 10, or 15 mg/day                 | Placebo | 8 | ABC-I↑                                                               | CGI-I↑<br>CYBOCS↑<br>ABC-SB↑<br>PedsQL↑  |
| Owen et al (2009)    | R, DB, PC                                                                                                 | ASD         | 6-17 | 98  | Aripiprazole<br><br>Randomised dose<br>5, 10, or 15 mg/day             | Placebo | 8 | ABC-I↑                                                               | CGI-I↑<br>CY-BOCS↑<br>ABC-SB↑<br>PedsQL↑ |
| Aman et al (2010)    | Line-item<br>analysis<br>based on the<br>studies by<br>Marcus et al<br>(2009) and<br>Owen et al<br>(2009) | ASD         | 6-17 | 316 | Aripiprazole<br><br>Flexible: 2-15mg/day<br>Fixed: 5, 10,<br>15mg/day) | Placebo | 8 | ABC-I↑                                                               | ABC-SB↑<br>ABC-H/NC↑<br>ABC-IS↑          |
| <b>Other agents</b>  |                                                                                                           |             |      |     |                                                                        |         |   |                                                                      |                                          |
| Jahromi et al (2009) | Secondary<br>analysis of<br>RUPPAN                                                                        | PDD<br>ADHD | 5-13 | 33  | Methylphenidate<br>0.125, 0.25, 0.5<br>mg/kg BID                       | Placebo | 4 | joint attention and self-<br>regulation behaviours<br>that was dose- |                                          |

|                         |               |     |       |    |                                                |         |    |                                                     |                                                                                                   |
|-------------------------|---------------|-----|-------|----|------------------------------------------------|---------|----|-----------------------------------------------------|---------------------------------------------------------------------------------------------------|
|                         | (2005)        |     |       |    |                                                |         |    | dependent.↑                                         |                                                                                                   |
| Anagnostou et al (2012) | R, DB, PC     | ASD | 18-60 | 19 | Oxytocin<br>Intranasal 24 IU<br>twice a day    | Placebo | 6  | CGI-I↔<br>DANVA-2↔<br>RBS-R↑ low order<br>behaviors | Reading the mind in the eyes<br>test↑<br>QoL↑<br>SRS↔<br>YBOCS↔<br>RBS-R high order<br>behaviors↔ |
| Watanabe et al (2015)   | R, DB, PC     | ASD | 18-55 | 18 | Oxytocin<br>Intranasal 24 IU<br>twice a day    | Placebo | 6  | ADOS reciprocity↑                                   | SRS↔<br>RBS↔<br>AQ↔<br>STAI↔<br>QoL↔<br>CGI↔<br>GAF↔                                              |
| Guastella et al (2015)  | R, DB, PC     | ASD | 12-18 | 50 | Oxytocin<br>Intranasal 18-24 IU<br>twice a day | Placebo | 18 | SRS↔<br>RBS↔<br>RMET-A↔<br>RMET-C↔                  | DBC↔<br>RBS↔                                                                                      |
| Yatawara et al (2016)   | R, DB, PC, XO | ASD | 3-8   | 31 | Oxytocin<br>Intranasal 12 IU<br>twice a day    | Placebo | 5  | SRS-P↑<br>RBS-R ↔                                   | CGI-I↑<br>ADOS- reciprocity↔<br>ADOS-communication↔<br>DBC-P↔<br>CSQ↔                             |

R=randomized, DB=double blind, SB=single blind, PC=placebo-controlled, OpL= open-label, XO=cross over ↑= significant improvement ↔ no change  
ABC = Aberrant Behavior Checklist, ABC-H/NC = ABC- Hyperactivity/Noncompliance, ABC-I = ABC Irritability, ABC-L/SW = ABC-Lethargy/Social Withdrawal, ABC-IS = ABC- Inappropriate Speech, ABC-SB = ABC-Stereotyped Behavior, ABC-SA = ABC-Social Avoidance, CATS-I = Core Autism Treatment Scale-Improvement (CATS-I), CCC-2 = Children's Communication Checklist-2, (C)Y-BOCS = (Children's) Yale-Brown Obsessive Compulsive Scale, IU = international unit, CSQ = caregiver strain questionnaire, DANVA-2 = Diagnostic Analysis of Nonverbal, Accuracy, ADOS = Autism Diagnostic Observation Schedule, RBS(-R) = Repetitive Behavior Scale(-Revised), DBC = Developmental Behavioural Checklist, GAF = Global Assessment of Functioning, CGI = Clinical Global Impression, STAI = State-Trait Anxiety Inventory, AQ = Autism Quotient, SRS = Social Responsiveness Scale, PedsQL = Pediatric Quality of Life Inventory, RFRLS = Ritvo-Freeman Real-Life Rating Scale, VABS = Vineland Adaptive Behaviour Scale, VAS = Visual Analogue Scale, TEA-CH = Test of Everyday Attention for Children, CNS-VS = computerized cognitive test battery CNS Vital Signs, W-JR = Woodcock-Johnson

Tests of Cognitive Ability—Revised, RBANS = The Repeatable Battery for the Assessment of the Neuropsychological Status, SNAP-IV = Swanson, Nolan and Pelham (SNAP) questionnaire.

Supplementary table 8. Summary of treatment studies for co-morbid conditions

| Study                   | Design                                                   | Population | Age (years) | Sample size (total) | Drug and dose (final mean unless other stated)                                        | Comparator | Duration (weeks) | Primary outcome                                                           | Secondary outcomes                                                                                                                     |
|-------------------------|----------------------------------------------------------|------------|-------------|---------------------|---------------------------------------------------------------------------------------|------------|------------------|---------------------------------------------------------------------------|----------------------------------------------------------------------------------------------------------------------------------------|
| Fankhauser et al (1992) | R, DB, PC, XO                                            | ASD        | 5-33        | 9                   | Clonidine<br>0.005 mg/kg/day                                                          | Placebo    | 4                | None specified                                                            | RFRLS-Sensory Motor↔<br>RFRLS-Affectual Reactions↑<br>RFRLS-Social Relationship↑<br>RFRLS-Language↔<br>RFRLS-Sensory Response↑<br>CGI↑ |
| Jaselskis et al (1992)  | R, DB, PC, XO                                            | ASD        | 5-13        | 8                   | Clonidine<br>0.15-0.20mg/day                                                          | Placebo    | 6                | None specified                                                            | ABC-I↑<br>ABC-L/SW↔<br>ABC-SB↑<br>ABC-H/NC↑<br>ABC-IS↑<br>CGI-I ↔<br>CPRS↑                                                             |
| Kent et al (2013)       | R, DB, PC                                                | ASD        | 9 (3.1)     | 96                  | Risperidone<br>Low dose =0.125 -<br>0.175 mg/day<br>High dose = 1.25 -<br>1.75 mg/day | Placebo    | 6                | ABC-I ↑ (high dose)                                                       | ABC-H/NC ↑ (high dose)<br>ABC-SB ↑ (low dose)<br>CY-BOCS compulsions ↑ (high dose)                                                     |
| McDougle et al (2005)   | Secondary analysis of McCracken (2002) and RUPPAN (2005) | ASD        | 8.8 (2.7)   | 101                 | Risperidone<br>2.0mg/day                                                              | Placebo    | 8 & 16           | Primary outcomes are reported in McCracken et al (2002) and RUPPAN (2005) | RFRLS↑<br>Y-BOCS↑<br>VABS↑                                                                                                             |
| Shea et al (2004)       | R, DC, PC                                                | ASD        | 7.5 (2.3)   | 79                  | Risperidone<br>1.17mg/day                                                             | Placebo    | 8                | ABC-I ↑                                                                   | ABC-H/NC↑<br>ABC-IS↑<br>ABC-L/SW↑<br>ABC-Stereotypy↑<br>N-CBRF (parent version):<br>Conduct Problem↑<br>Hyperactive↑                   |

|                        |                    |                                                        |            |                        |                            |                                           |        |                                                          |                                                                                                                                                                                                                                              |
|------------------------|--------------------|--------------------------------------------------------|------------|------------------------|----------------------------|-------------------------------------------|--------|----------------------------------------------------------|----------------------------------------------------------------------------------------------------------------------------------------------------------------------------------------------------------------------------------------------|
|                        |                    |                                                        |            |                        |                            |                                           |        |                                                          | Self-isolation↔<br>Insecure/anxious↑<br>Overly Sensitive↑<br>Self-injurious/stereotypic↔<br>VAS (most troublesome symptom)<br>↑                                                                                                              |
| Troost et al (2005)    | OpL+ R,DB<br>PDisc | ASD                                                    | 9 (2.3)    | 26 (OpL)<br>24 (PDisc) | Risperidone<br>1.9mg/day   | Placebo                                   | 8+16+8 | Relapse rate↑                                            | ABC-I↑<br>ABC-H/NC↔<br>ABC-IS↔<br>ABC-L/SW↔<br>ABC-SB↔                                                                                                                                                                                       |
| Gordon et al (1993)    | R, DB, PC          | ASD                                                    | 10.4 (4.1) | 24                     | Clomipramine<br>152mg/day  | Placebo<br><br>Desipramine =<br>127mg/day | 10     | CPRS – Autism Subscale↑<br>vs placebo & desipramine      | CPRS OCD Subscale↑ vs placebo & desipramine<br>CGI-efficacy index ↑ vs placebo & desipramine<br>NIMH OCD Scale ↑ vs placebo & desipramine<br>NIMH Global OCD Scale↑ vs placebo & desipramine<br>NIMH Anxiety scale↑ vs placebo & desipramine |
| King et al (2009)      | R, DB, PC          | ASD                                                    | 9.3 (3.1)  | 149                    | Citalopram<br>16.5mg/day   | Placebo                                   | 12     | CGI-I ↔                                                  | CYBOCS-PDD↔<br>RBS-R↔<br>ABC↔                                                                                                                                                                                                                |
| Hollander et al (2012) | R, DB, PC,<br>XO   | ASD                                                    | 34 (14)    | 37                     | Fluoxetine<br>64.76 mg/day | Placebo                                   | 12     | Y-BOCS↑                                                  | CGI↑<br>ABC-I↔                                                                                                                                                                                                                               |
| Hollander et al (2005) | R, DC, PC,<br>XO   | ASD                                                    | 8 (3)      | 45                     | Fluoxetine<br>9.9mg/day    | Placebo                                   | 8      | CY-BOCS-compulsions ↑                                    | CGI-AD↔                                                                                                                                                                                                                                      |
| Gringras et al (2012)  | R, DB, PC,<br>XO   | Neurodevelopmental<br>and<br>neurological<br>disorders | 8.5 (3)    | 146                    | Melatonin<br>.05-12mg/day  | Placebo                                   | 12     | Sleep time↑                                              | Sleep onset↑                                                                                                                                                                                                                                 |
| Cortesi et al (2012)   | R, DB, PC          | ASD                                                    | 6.4 (1.1)  | 144                    | Melatonin<br>3mg/day       | Placebo                                   | 12     | Sleep time↑ drug alone and<br>combination in combination | Sleep onset↑<br>Sleep efficiency ↑                                                                                                                                                                                                           |

|                           |                                                                           |     |           |     |                                                                           |         |    |                                                                                                                           |                                                                                                                                                                                                                      |
|---------------------------|---------------------------------------------------------------------------|-----|-----------|-----|---------------------------------------------------------------------------|---------|----|---------------------------------------------------------------------------------------------------------------------------|----------------------------------------------------------------------------------------------------------------------------------------------------------------------------------------------------------------------|
|                           |                                                                           |     |           |     | CBT<br>four sessions of<br>50m with a clinical<br>psychologist            |         |    | with CBT                                                                                                                  | Wake after sleep onset↑<br><br>All alone and combination superior<br>to placebo                                                                                                                                      |
| Shea et al<br>(2004)      | R, DB, PC                                                                 | ASD | 7.5 (2.3) | 79  | Risperidone<br>1.17mg/day                                                 | Placebo | 8  | ABC-I↑                                                                                                                    | ABC-H/NC↑<br>ABC-IS↑<br>ABC-L/SW↑<br>ABC-SB↑<br>N-CBRF(PV) conduct problems↑<br>N-CBRF(PV) insecure/anxious↑<br>N-CBRF(PV) hyperactive↑<br>N-CBRF(PV) overly sensitive↑<br>CGI-C↑<br>VAS – most troublesome symptom↑ |
| Kent et al<br>(2013)      | R, DB, PC                                                                 | ASD | 9 (3.1)   | 96  | Risperidone<br>low =0.125 -0.175<br>mg/day<br>high = 1.25 -1.75<br>mg/day | Placebo | 6  | ABC-I↑ high dose                                                                                                          | ABC-H/NC↑ high dose<br>ABC-IS↔<br>ABC-L/SW↔<br>ABC-SB↑ low dose<br>CGI-S↑ high dose<br>CY-BOCS↑ high dose                                                                                                            |
| McCracken<br>et al (2002) | R, DB, PC                                                                 | ASD | 8.8 (2.7) | 101 | Risperidone<br>1.8mg/day                                                  | Placebo | 8  | ABC-I↑                                                                                                                    | ABC-H/NC↑<br>ABC-IS↔<br>ABC-L/SW↔<br>ABC-SB↑<br>CGI-I ↑                                                                                                                                                              |
| Luby et al<br>(2006)      | R, DB, PC                                                                 | ASD | 4 (1)     | 32  | Risperidone<br>1.38mg/day                                                 | Placebo | 26 | CARS↑                                                                                                                     |                                                                                                                                                                                                                      |
| Nagaraj et al<br>(2006)   | R, DB, PC                                                                 | ASD | 5 (1.7)   | 40  | Risperidone<br>1mg/day                                                    | Placebo | 26 | CARS↑                                                                                                                     | CGAS↑                                                                                                                                                                                                                |
| Marcus et<br>al., (2011)  | OpL safety<br>report follow-<br>up of Marcus<br>(2009) and<br>Owen (2009) | ASD | 9.6 (3)   | 330 | Aripiprazole<br>10.6mg/day                                                | N/A     | 52 | Adverse events:<br>Weight gain<br>Vomiting<br>Nasopharyngitis<br>Increased appetite<br>Pyrexia<br>Upper respiratory tract | Discontinuation mostly due to<br>aggression and weight increase.                                                                                                                                                     |

|                                   |                  |     |            |     |                                                                  |         |    |                       |                                                                                                         |
|-----------------------------------|------------------|-----|------------|-----|------------------------------------------------------------------|---------|----|-----------------------|---------------------------------------------------------------------------------------------------------|
|                                   |                  |     |            |     |                                                                  |         |    | infection<br>Insomnia |                                                                                                         |
| Paribello et al (2010)            | OpL              | FSX | 18 (5)     | 20  | Minocycline<br>100 or 200mg/day                                  | N/A     | 8  | ABC-I↑                | VAS for behaviour↑<br>CGI-I↑<br>ABC-L↔<br>ABC-SB↑<br>ABC-H↑<br>ABC-IS↑                                  |
| Leigh et al., (2013)              | R, DB, PC        | FSX | 9.2 (3.6)  | 55  | Minocycline<br>25-100mg/day                                      | Placebo | 13 | CGI-I↑                | VAS – most troublesome<br>symptom↔<br>ABC ↔<br>VABS-II ↔<br>EVT-2↔                                      |
| Erickson et al., 2014             | OpL              | ASD | 6-17       | 32  | Arbaclofen<br>2-30mg/day                                         | N/A     | 8  | ABC-I↑                | ABC-L/SW↑<br>ABC-H/NC↑<br>ABC-IS↔<br>ABC-SB↑<br>RRS↑<br>CY-BOCS-PDD↑<br>ADHD-IV RS↑<br>CGI-I↑<br>CGI-S↑ |
| Veenstra-VanderWeele et al., 2016 | R, DB, PC        | ASD | 11.6 (4.6) | 150 | Arbaclofen<br>Children =<br>26.8mg/day<br>adults =<br>41.1mg/day | Placebo | 12 | ABC-L/SW↔             | CGI-S↑<br>CGI-I↔<br>ADHD-IV RS↔<br>VAS-Anxiety↔<br>VAS-Disruptive↔<br>VABS II Socialisation↔            |
| Berry-Kravis et al., 2012         | R, PC, DB,<br>XO | FSX | 6-40       | 63  | Arbaclofen<br>20-30mg/day                                        | Placebo | 4  | ABC-I↔                | CGI-I↔<br>CGI-S↔<br>VAS Problem behaviours↑                                                             |
| King et al., 2001                 | R, DB, PC        | ASD | 5-11       | 39  | Amantadine<br>5mg/kg per day                                     | Placebo | 4  | Responder rate↔       | ABC-I↔<br>ABC-L/SW↔<br>ABC-H/NC↑<br>ABC-IS↑<br>ABC-SB↔                                                  |

|                          |                                   |     |             |     |                                                                     |                                                      |           |                                                 |                                                                                                                                                                                  |
|--------------------------|-----------------------------------|-----|-------------|-----|---------------------------------------------------------------------|------------------------------------------------------|-----------|-------------------------------------------------|----------------------------------------------------------------------------------------------------------------------------------------------------------------------------------|
|                          |                                   |     |             |     |                                                                     |                                                      |           |                                                 | CGI↑                                                                                                                                                                             |
| Reichow et al., 2013     | Meta-analysis of four studies     | ASD | 7           | 94  | Methylphenidate .4-.45mg/kg                                         | Placebo                                              | 1-2       | ADHD symptoms↑                                  | Hyperactivity↑                                                                                                                                                                   |
| RUPP, 2005               | R, DB, PC, XO + OpL               | ASD | 7.5 (2.2)   | 72  | Methylphenidate 7.5-50mg/day                                        | Placebo                                              | 4 + 8 OpL | ABC-H/NC↑                                       | ABC-I↔<br>ABC-L/SW↔<br>ABC-IS↑<br>ABC-SB↑                                                                                                                                        |
| Harfterkamp et al., 2012 | R, DB, PC                         | ASD | 9.95 (2.8)  | 97  | Atomoxetine 1.2mg/kg/day                                            | Placebo                                              | 8         | ADHD-RS↑                                        | ADHD-RS Inattention↑<br>ADHD-RS Hyper-imp↑<br>CTRS-R:S Hyperactivity↑<br>CTRS-R:S Oppositional↔<br>CTRS-R:S Cognitive/attention↔<br>CTRS-R:S ADHD↔<br>CGI-I↔                     |
| Arnold et al., 2006      | R, DB, PC, XO                     | ASD | 9.26 (2.93) | 16  | Atomoxetine 20-100mg/day                                            | Placebo                                              | 6         | ABC-H/NC↑                                       | Hyperactivity/impulsive↑<br>Inattentive↔<br>ABC-I↔<br>ABC-L/SW↑<br>ABC-IS↔<br>ABC-SB↔                                                                                            |
| Handen et al., 2015      | R, DB*, PC + parent training (PT) | ASD | 8.1 (2.1)   | 128 | Atomoxetine 40-49.8mg/day<br><br>9 sessions of Parent Training (PT) | (1) ATX<br>(2) ATX+PT<br>(3)Placebo+PT<br>(4)Placebo | 10        | SNAP-P ADHD↑ (1:4, 2:4, 3:4)<br>HSQ↑ (1:4, 2:4) | ABC-H/NC↑ (1:4, 2:4)<br>ABC-I↑ (3:4)<br>ABC-L/SW↔<br>ABC-IS↑ (2:4, 3:4)<br>ABC-SB↔<br>SSQ↑ (3:4)<br>SNAP-P Inattention↑ (1:4, 2:4, 3:4)<br>SNAP-P Hyperactivity↑ (1:4, 2:4, 3:4) |
| Smith et al 2016         | DB**, PC extension to Handen 2015 | ASD | 8.1 (2.1)   | 117 | Atomoxetine 49.8(23.3) alone<br>40.0(18.4) combined                 | ATX,<br>ATX+PT,<br>Placebo+PT,<br>placebo            | 24        | None specified                                  |                                                                                                                                                                                  |
| Scahill et al. 2015      | R, DB, PC                         | ASD | 8.5 (2.25)  | 62  | Guanfacine 1-4mg/day                                                | Placebo                                              | 8         | ABC-H/NC↑                                       | ABC-I↑↓<br>ABC-L/SW↔<br>ABC-IS↑                                                                                                                                                  |

|                          |               |     |            |    |                              |         |    |                |                                                                                                                                                                             |
|--------------------------|---------------|-----|------------|----|------------------------------|---------|----|----------------|-----------------------------------------------------------------------------------------------------------------------------------------------------------------------------|
|                          |               |     |            |    |                              |         |    |                | ABC-SB↑<br>ADHD-RS ↑<br>ADHD-RS Inattention↑<br>ADHD-RS Hyperactivity↑                                                                                                      |
| Niederhofer et al., 2002 | R, DB, PC, XO | ASD | 8.3 (3.55) | 12 | Lofexidine<br>0.8-1.2mg/day  | Placebo | 6  | None specified | CPRS↑<br>ABC-H/NC↑<br>ABC-I↑<br>ABC-SB↑<br>ABC-IS↑<br>Clinician ratings↔                                                                                                    |
| Buchsbaum et al., 2001   | R, DB, PC, XO | ASD | 30.5 (8.6) | 6  | Fluoxetine<br>20-40mg/day    | Placebo | 16 | None specified | Y-BOCS↑<br>Y-BOCS Obsessions↑<br>Y-BOCS Compulsions↔<br>CGI Autism ↔<br>Hamilton Anxiety↑<br>HRSD ↔                                                                         |
| McDougle et al., 1998    | R, DB, PC     | ASD | 28.1 (7.3) | 31 | Risperidone<br>2.9 mg/day    | Placebo | 12 | None specified | CGI↑<br>Y-BOCS↑<br>SIB-Q↑<br>RFRLS-Sensory Motor↑<br>RFRLS-Affectual Reactions↑<br>RFRLS-Social Relationship↔<br>RFRLS-Language↔<br>RFRLS-Sensory Response↔                 |
| McDougle et al., 1996    | R, DB, PC     | ASD | 30.1 (7.7) | 30 | Fluvoxamine<br>276.7mg/day   | Placebo | 12 | Y-BOCS↑        | CGI↑<br>VABS ↑<br>Brown Aggression Scale↑<br>RFRLS-Sensory Motor↔<br>RFRLS-Affectual Reactions↔<br>RFRLS-Social Relationship↔<br>RFRLS-Language↑<br>RFRLS-Sensory Response↔ |
| Fung et al., 2014        | OpL           | ASD | 22.5 (5.8) | 12 | Pregnenolone<br>50-250mg/day | N/A     | 12 | ABC-I↑         | ABC-L/SW↑<br>ABC-H/NC↔<br>ABC-SB↔<br>ABC-IS↔                                                                                                                                |

|  |  |  |  |  |  |  |  |  |  |                                          |
|--|--|--|--|--|--|--|--|--|--|------------------------------------------|
|  |  |  |  |  |  |  |  |  |  | Short Sensory Profile↑<br>SRS↔<br>VABS ↔ |
|--|--|--|--|--|--|--|--|--|--|------------------------------------------|

R = randomized, DB = double-blind, PC = placebo-controlled PDisc = Placebo Discontinuation XO = cross over \*single blind for parent training ↑=significant improvement

↔=no change \*\*double blind for responders, open label for placebo non-responders on ATX.

CPRS = Children's Psychiatric Rating Scale, RFRLS = Ritvo-Freeman Real-Life Rating Scale, SIB-Q = Self-Injurious Behavior Questionnaire, SRS = Social Responsiveness Scale, ABC = Aberrant Behavior Checklist, ABC-H/NC = ABC- Hyperactivity/Noncompliance, ABC-I = ABC Irritability, ABC-L/SW = ABC-Lethargy/Social Withdrawal, ABC-IS = ABC-Inappropriate Speech, ABC-SB = ABC-Stereotyped Behavior, CPRS = The Conners' Parent Rating Scale, RSB(-R) = Repetitive Behavior Scale(-Revised), CGI = Clinical Global Impression
